# Supplementary material for: Synthesis and characterization of hexaarylbenzenes with five or six different substituents enabled by programmed synthesis
Source: Springer Nature journal article supplement (doi:10.1038/nchem.2174), 2015-01-26
Supplement: 41557_2015_BFnchem2174_MOESM19_ESM.mol [file 41557_2015_BFnchem2174_MOESM19_ESM.mol]

  ChemDraw01071509582D

 39 43  0  0  0  0  0  0  0  0999 V2000
    0.6637   -0.8144    0.0000 C   0  0  0  0  0  0  0  0  0  0  0  0
    0.4079   -0.0327    0.0000 C   0  0  0  0  0  0  0  0  0  0  0  0
   -0.4146   -0.0344    0.0000 C   0  0  0  0  0  0  0  0  0  0  0  0
   -0.6671   -0.8172    0.0000 C   0  0  0  0  0  0  0  0  0  0  0  0
   -0.0007   -1.2992    0.0000 S   0  0  0  0  0  0  0  0  0  0  0  0
    1.4489   -1.0677    0.0000 C   0  0  0  0  0  0  0  0  0  0  0  0
    1.6203   -1.8769    0.0000 C   0  0  0  0  0  0  0  0  0  0  0  0
    2.4048   -2.1320    0.0000 C   0  0  0  0  0  0  0  0  0  0  0  0
    3.0181   -1.5795    0.0000 C   0  0  0  0  0  0  0  0  0  0  0  0
    2.8467   -0.7725    0.0000 C   0  0  0  0  0  0  0  0  0  0  0  0
    2.0616   -0.5175    0.0000 C   0  0  0  0  0  0  0  0  0  0  0  0
   -0.9010    0.6322    0.0000 C   0  0  0  0  0  0  0  0  0  0  0  0
   -0.5642    1.3869    0.0000 C   0  0  0  0  0  0  0  0  0  0  0  0
   -1.0490    2.0546    0.0000 C   0  0  0  0  0  0  0  0  0  0  0  0
   -1.8697    1.9686    0.0000 C   0  0  0  0  0  0  0  0  0  0  0  0
   -2.2055    1.2144    0.0000 C   0  0  0  0  0  0  0  0  0  0  0  0
   -1.7201    0.5468    0.0000 C   0  0  0  0  0  0  0  0  0  0  0  0
   -1.4512   -1.0737    0.0000 C   0  0  0  0  0  0  0  0  0  0  0  0
   -2.0649   -0.5203    0.0000 C   0  0  0  0  0  0  0  0  0  0  0  0
   -2.8501   -0.7753    0.0000 C   0  0  0  0  0  0  0  0  0  0  0  0
   -3.0214   -1.5823    0.0000 C   0  0  0  0  0  0  0  0  0  0  0  0
   -2.4082   -2.1347    0.0000 C   0  0  0  0  0  0  0  0  0  0  0  0
   -1.6236   -1.8797    0.0000 C   0  0  0  0  0  0  0  0  0  0  0  0
    0.8964    0.6426    0.0000 C   0  0  0  0  0  0  0  0  0  0  0  0
    1.7165    0.5560    0.0000 C   0  0  0  0  0  0  0  0  0  0  0  0
    2.2019    1.2237    0.0000 C   0  0  0  0  0  0  0  0  0  0  0  0
    1.8661    1.9774    0.0000 C   0  0  0  0  0  0  0  0  0  0  0  0
    1.0454    2.0639    0.0000 C   0  0  0  0  0  0  0  0  0  0  0  0
    0.5605    1.3962    0.0000 C   0  0  0  0  0  0  0  0  0  0  0  0
    3.8027   -1.8345    0.0000 C   0  0  0  0  0  0  0  0  0  0  0  0
    3.9746   -2.6415    0.0000 C   0  0  0  0  0  0  0  0  0  0  0  0
    4.4159   -1.2826    0.0000 C   0  0  0  0  0  0  0  0  0  0  0  0
    4.5850   -2.0976    0.0000 C   0  0  0  0  0  0  0  0  0  0  0  0
    2.3495    2.6428    0.0000 O   0  0  0  0  0  0  0  0  0  0  0  0
    3.1675    2.5568    0.0000 C   0  0  0  0  0  0  0  0  0  0  0  0
   -3.8032   -1.8379    0.0000 C   0  0  0  0  0  0  0  0  0  0  0  0
   -4.5850   -2.0936    0.0000 F   0  0  0  0  0  0  0  0  0  0  0  0
   -3.9727   -2.6428    0.0000 F   0  0  0  0  0  0  0  0  0  0  0  0
   -4.4155   -1.2887    0.0000 F   0  0  0  0  0  0  0  0  0  0  0  0
  1  2  2  0      
  2  3  1  0      
  3  4  2  0      
  4  5  1  0      
  5  1  1  0      
  1  6  1  0      
  6  7  1  0      
  7  8  2  0      
  8  9  1  0      
  9 10  2  0      
 10 11  1  0      
 11  6  2  0      
  3 12  1  0      
 12 13  2  0      
 13 14  1  0      
 14 15  2  0      
 15 16  1  0      
 16 17  2  0      
 17 12  1  0      
  4 18  1  0      
 18 19  2  0      
 19 20  1  0      
 20 21  2  0      
 21 22  1  0      
 22 23  2  0      
 23 18  1  0      
 24 25  1  0      
 25 26  2  0      
 26 27  1  0      
 27 28  2  0      
 28 29  1  0      
 29 24  2  0      
 27 34  1  0      
  9 30  1  0      
 21 36  1  0      
 30 31  1  0      
 30 32  1  0      
 30 33  1  0      
 24  2  1  0      
 34 35  1  0      
 36 37  1  0      
 36 38  1  0      
 36 39  1  0      
M  END
