# Supplementary material for: Synthesis and characterization of hexaarylbenzenes with five or six different substituents enabled by programmed synthesis
Source: Springer Nature journal article supplement (doi:10.1038/nchem.2174), 2015-01-26
Supplement: 41557_2015_BFnchem2174_MOESM52_ESM.mol [file 41557_2015_BFnchem2174_MOESM52_ESM.mol]

  ChemDraw01071509582D

 51 57  0  0  0  0  0  0  0  0999 V2000
   -0.4150   -1.0714    0.0000 C   0  0  0  0  0  0  0  0  0  0  0  0
    0.4095   -1.0714    0.0000 C   0  0  0  0  0  0  0  0  0  0  0  0
   -0.8275   -1.7859    0.0000 C   0  0  0  0  0  0  0  0  0  0  0  0
    0.8220   -1.7859    0.0000 C   0  0  0  0  0  0  0  0  0  0  0  0
    0.4095   -2.5003    0.0000 C   0  0  0  0  0  0  0  0  0  0  0  0
    0.8220   -3.2148    0.0000 C   0  0  0  0  0  0  0  0  0  0  0  0
    1.6470   -3.2148    0.0000 N   0  0  0  0  0  0  0  0  0  0  0  0
    2.0595   -2.5003    0.0000 C   0  0  0  0  0  0  0  0  0  0  0  0
    1.6470   -1.7859    0.0000 C   0  0  0  0  0  0  0  0  0  0  0  0
   -1.6526   -1.7859    0.0000 C   0  0  0  0  0  0  0  0  0  0  0  0
   -2.0651   -2.5003    0.0000 C   0  0  0  0  0  0  0  0  0  0  0  0
   -1.6526   -3.2148    0.0000 N   0  0  0  0  0  0  0  0  0  0  0  0
   -0.8275   -3.2148    0.0000 C   0  0  0  0  0  0  0  0  0  0  0  0
   -0.4150   -2.5003    0.0000 C   0  0  0  0  0  0  0  0  0  0  0  0
    0.8220   -0.3569    0.0000 C   0  0  0  0  0  0  0  0  0  0  0  0
    0.4108    0.3551    0.0000 C   0  0  0  0  0  0  0  0  0  0  0  0
   -0.4150    0.3575    0.0000 C   0  0  0  0  0  0  0  0  0  0  0  0
   -0.8275   -0.3569    0.0000 C   0  0  0  0  0  0  0  0  0  0  0  0
   -0.8275    1.0720    0.0000 C   0  0  0  0  0  0  0  0  0  0  0  0
   -1.6526   -0.3569    0.0000 C   0  0  0  0  0  0  0  0  0  0  0  0
    1.6470   -0.3569    0.0000 C   0  0  0  0  0  0  0  0  0  0  0  0
    0.8220    1.0720    0.0000 C   0  0  0  0  0  0  0  0  0  0  0  0
    2.0595   -1.0714    0.0000 C   0  0  0  0  0  0  0  0  0  0  0  0
    2.8846   -1.0714    0.0000 C   0  0  0  0  0  0  0  0  0  0  0  0
    3.2971   -0.3569    0.0000 C   0  0  0  0  0  0  0  0  0  0  0  0
    2.8846    0.3575    0.0000 C   0  0  0  0  0  0  0  0  0  0  0  0
    2.0595    0.3575    0.0000 C   0  0  0  0  0  0  0  0  0  0  0  0
    1.6470    1.0720    0.0000 C   0  0  0  0  0  0  0  0  0  0  0  0
    2.0595    1.7859    0.0000 C   0  0  0  0  0  0  0  0  0  0  0  0
    1.6470    2.5003    0.0000 C   0  0  0  0  0  0  0  0  0  0  0  0
    0.8220    2.5003    0.0000 C   0  0  0  0  0  0  0  0  0  0  0  0
    0.4095    1.7859    0.0000 C   0  0  0  0  0  0  0  0  0  0  0  0
   -0.4150    1.7859    0.0000 C   0  0  0  0  0  0  0  0  0  0  0  0
   -0.8275    2.5003    0.0000 C   0  0  0  0  0  0  0  0  0  0  0  0
   -1.6526    2.5003    0.0000 C   0  0  0  0  0  0  0  0  0  0  0  0
   -2.0651    1.7859    0.0000 C   0  0  0  0  0  0  0  0  0  0  0  0
   -1.6526    1.0720    0.0000 C   0  0  0  0  0  0  0  0  0  0  0  0
   -2.0651    0.3575    0.0000 C   0  0  0  0  0  0  0  0  0  0  0  0
   -2.8901    0.3575    0.0000 C   0  0  0  0  0  0  0  0  0  0  0  0
   -3.3026   -0.3569    0.0000 C   0  0  0  0  0  0  0  0  0  0  0  0
   -2.8901   -1.0714    0.0000 C   0  0  0  0  0  0  0  0  0  0  0  0
   -2.0651   -1.0714    0.0000 C   0  0  0  0  0  0  0  0  0  0  0  0
    4.1221   -0.3569    0.0000 C   0  0  0  0  0  0  0  0  0  0  0  0
    4.5346    0.3575    0.0000 C   0  0  0  0  0  0  0  0  0  0  0  0
    4.5346   -1.0714    0.0000 C   0  0  0  0  0  0  0  0  0  0  0  0
    4.9472   -0.3489    0.0000 C   0  0  0  0  0  0  0  0  0  0  0  0
    2.0595    3.2148    0.0000 Cl  0  0  0  0  0  0  0  0  0  0  0  0
   -4.1249   -0.3569    0.0000 C   0  0  0  0  0  0  0  0  0  0  0  0
   -4.5360    0.3552    0.0000 F   0  0  0  0  0  0  0  0  0  0  0  0
   -4.9472   -0.3569    0.0000 F   0  0  0  0  0  0  0  0  0  0  0  0
   -4.5360   -1.0690    0.0000 F   0  0  0  0  0  0  0  0  0  0  0  0
  1  2  2  0      
  1  3  1  0      
  2  4  1  0      
  4  5  1  0      
  5  6  2  0      
  6  7  1  0      
  7  8  2  0      
  8  9  1  0      
  9  4  2  0      
  3 10  2  0      
 10 11  1  0      
 11 12  2  0      
 12 13  1  0      
 13 14  2  0      
 14  3  1  0      
 15 16  2  0      
 16 17  1  0      
 17 18  2  0      
 17 19  1  0      
 18 20  1  0      
 15 21  1  0      
 16 22  1  0      
 21 23  1  0      
 23 24  2  0      
 24 25  1  0      
 25 26  2  0      
 26 27  1  0      
 27 21  2  0      
 22 28  1  0      
 28 29  2  0      
 29 30  1  0      
 30 31  2  0      
 31 32  1  0      
 32 22  2  0      
 19 33  2  0      
 33 34  1  0      
 34 35  2  0      
 35 36  1  0      
 36 37  2  0      
 37 19  1  0      
 20 38  2  0      
 38 39  1  0      
 39 40  2  0      
 40 41  1  0      
 41 42  2  0      
 42 20  1  0      
 25 43  1  0      
 43 44  1  0      
 43 45  1  0      
 43 46  1  0      
 30 47  1  0      
 40 48  1  0      
 15  2  1  0      
 18  1  1  0      
 48 49  1  0      
 48 50  1  0      
 48 51  1  0      
M  END
